# Supplementary material for: Cyanobacterial Toxins and Peptides in Lake Vegoritis, Greece
Source: MDPI journal article supplement (doi:10.3390/toxins13060394), 2021-06-01
Supplement: s1 [file s1]

# Supplementary Materials: Cyanobacterial Toxins and Peptides in Lake Vegoritis, Greece

Sevasti-Kiriaki Zervou, Kimon Moschandreou, Aikaterina Paraskevopoulou, Christophoros Christophoridis, Elpida Grigoriadou, Triantafyllos Kaloudis, Theodoros M. Triantis, Vasiliki Tsiaoussi and Anastasia Hiskia

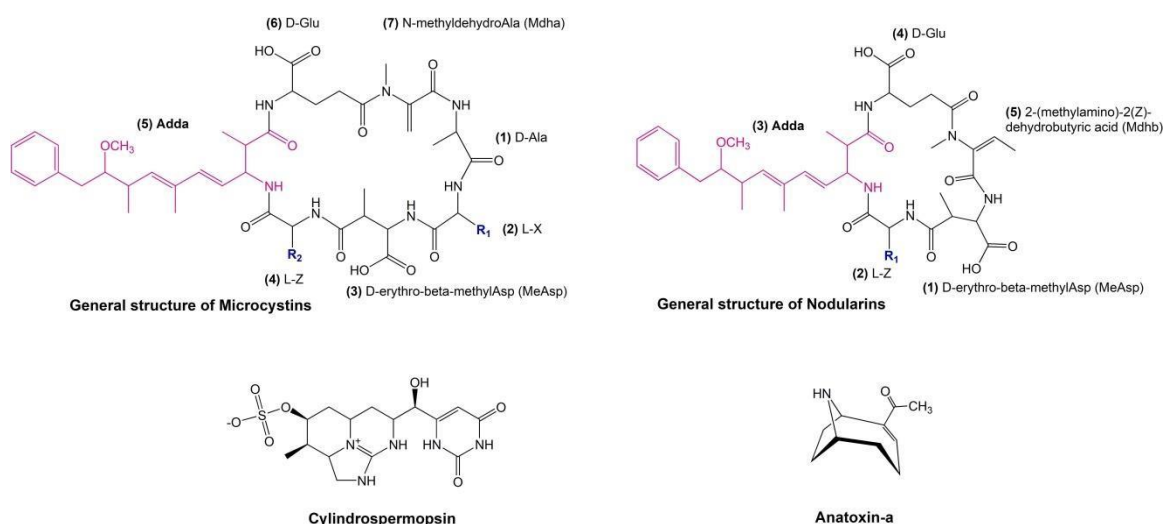

**Figure S1.** Structures of several classes of cyanotoxins. For the classes of Microcystins and Nodularins, R<sub>x</sub> stands for variable L-amino acids.

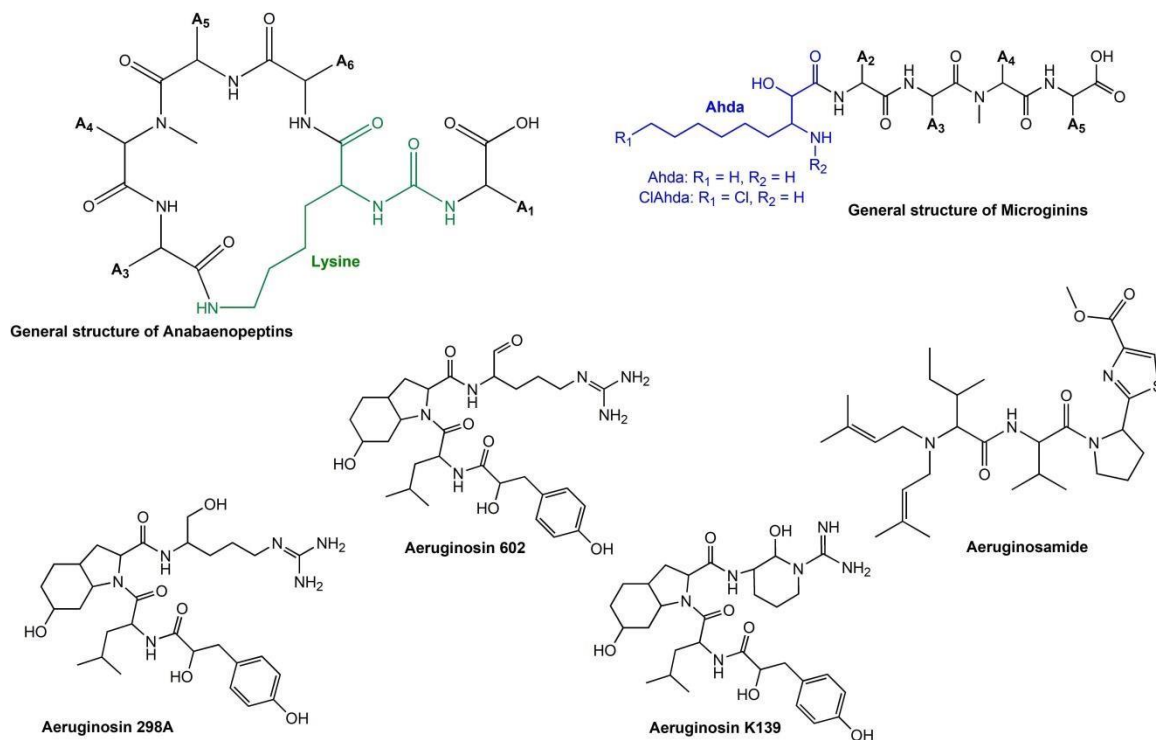

**Figure S2.** Structures of several classes of cyanopeptides. For the classes of Anabaenopeptins and Microginins, A<sub>x</sub> stands for variable L-amino acids.

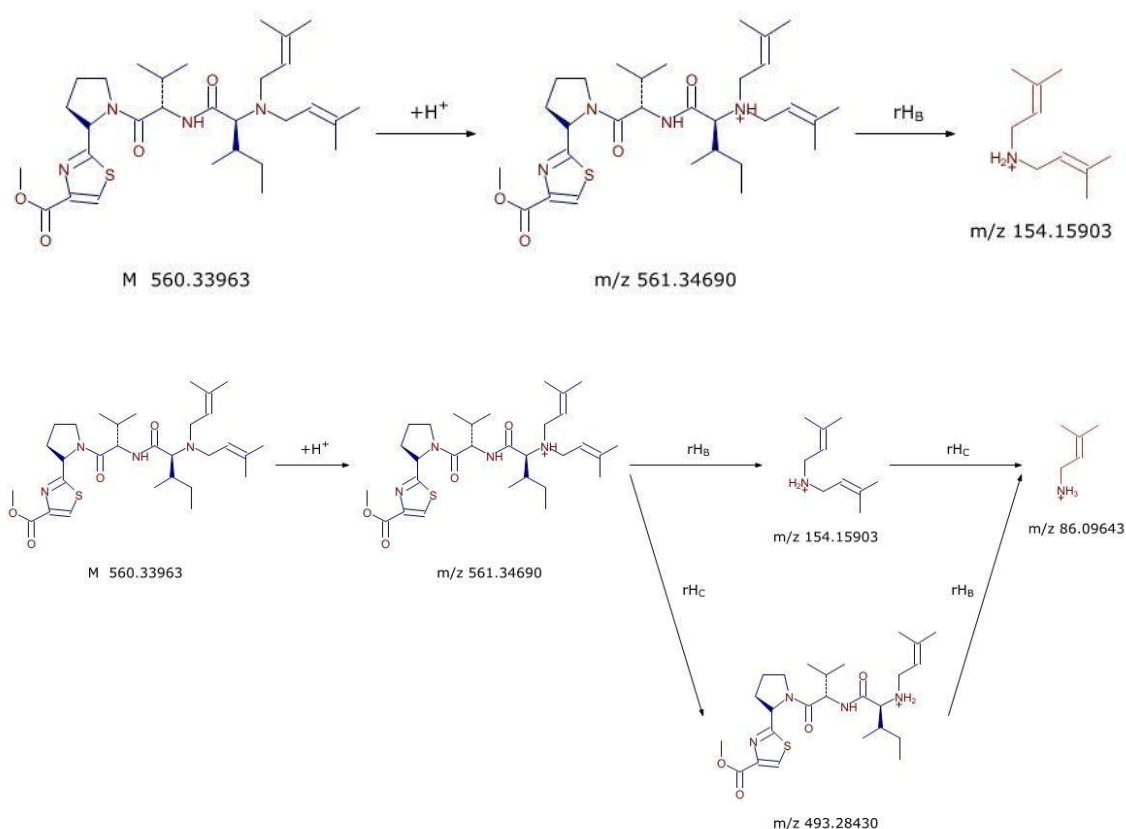

**Figure S3.** Fragmentation pathways of AEG A involving the  $m/z$  154.2 and 86.0 fragment ions. Fragmentation pathways predicted by Mass Frontier 8.0 software.

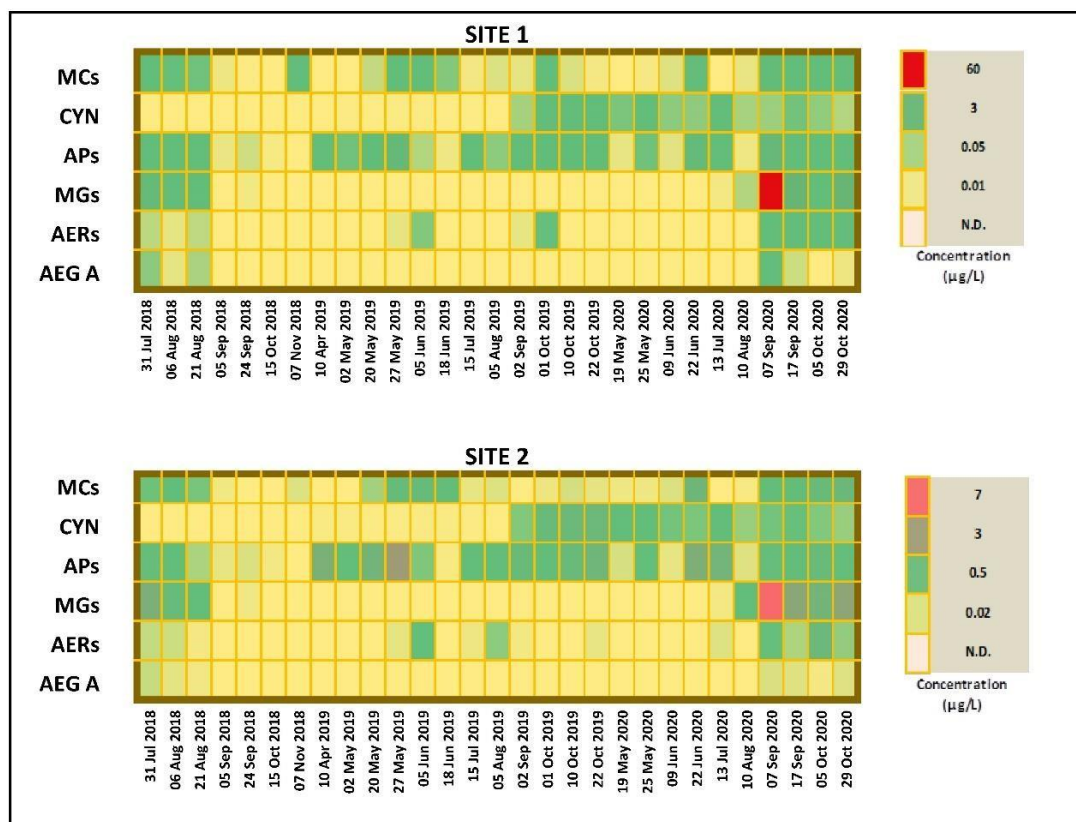

**Figure S4.** Heat maps showing all CP and CT concentrations detected in Lake Vegoritis throughout the two sampling points (Site 1 and Site 2).

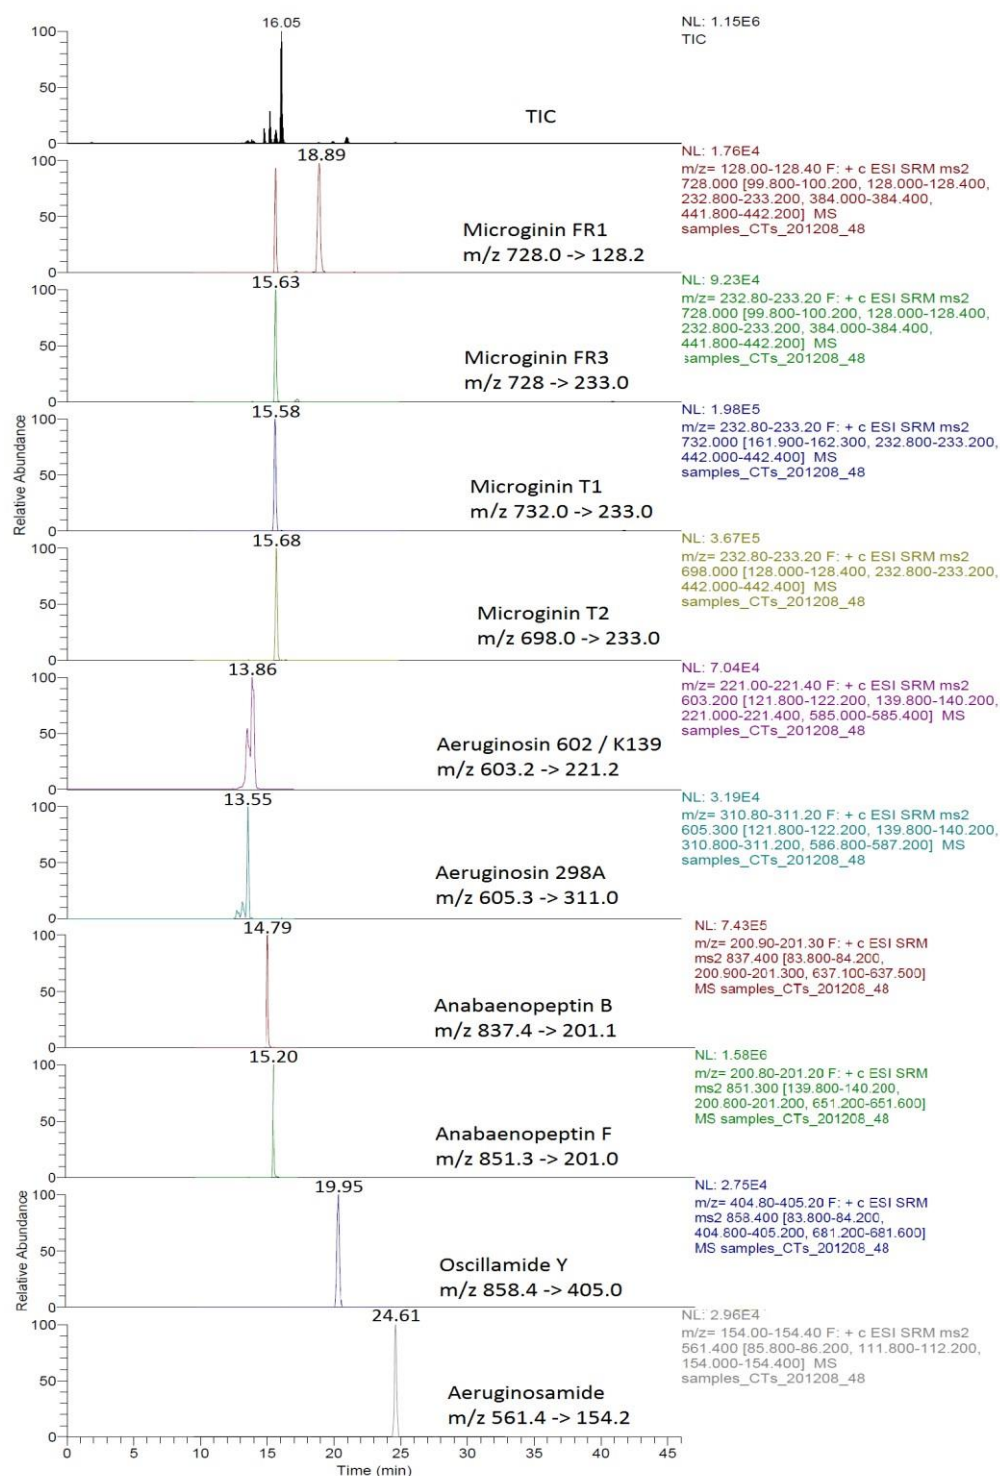

**Figure S5.** TIC and MRM chromatograms of quantifier ions for the cyanopeptides obtained from the biomass extract of Lake Kastoria (sampling September 2014).

**Table S1.** Physico-chemical parameters, total phytoplankton biomass and cyanobacteria biomass concentrations measured during the study period.

| NMWN sampling point                  |              |                      |                              |           |                    |            |                                        |           |            |             |            |             |              |              |            |           |             |             |
|--------------------------------------|--------------|----------------------|------------------------------|-----------|--------------------|------------|----------------------------------------|-----------|------------|-------------|------------|-------------|--------------|--------------|------------|-----------|-------------|-------------|
| Sampling Date                        | Chl-α (µg/L) | Total Biomass (mg/L) | Cyanobacteria Biomass (mg/L) | TP (mg/L) | Alkalinity (meq/L) | TSS (mg/L) | Transparency (Secchi disc depth in cm) | F- (mg/L) | Cl- (mg/L) | NO2- (mg/L) | Br- (mg/L) | NO3- (mg/L) | PO43- (mg/L) | SO42- (mg/L) | Na+ (mg/L) | K+ (mg/L) | Mg2+ (mg/L) | Ca2+ (mg/L) |
| 5-Feb-18                             |              |                      |                              | 0.060     | 4.75               | 1.07       | 650.00                                 | <LOQ      | 36         | <LOQ        | <LOQ       | 0.93        | <LOQ         | 200          | 35         | 5.4       | 45          | 38          |
| 25-Apr-18                            |              |                      |                              | 0.050     | 4.91               | 1.41       | 600.00                                 | <LOQ      | 36         | <LOQ        | <LOQ       | 0.53        | <LOQ         | 89           | 36         | 5.8       | 45          | 44          |
| 18-Jun-18                            | 15.85        | 2.299                | 1.180                        | 0.043     | 4.04               | 8.46       | 30.00                                  | <LOQ      | 35         | <LOQ        | <LOQ       | <LOQ        | <LOQ         | 87           | 36         | 6.0       | 45          | 26          |
| 4-Jul-18                             | 8.01         |                      |                              | 0.040     | 4.05               | 2.86       | 240.00                                 | <LOQ      | 35         | <LOQ        | <LOQ       | 0.37        | <LOQ         | 160          | 37         | 6.2       | 46          | 32          |
| 12-Jul-18                            | 7.92         |                      |                              | 0.036     | 4.11               | 2.96       | 300.00                                 | <LOQ      | 35         | <LOQ        | <LOQ       | 0.53        | <LOQ         | 93           | 37         | 5.9       | 46          | 32          |
| 17-Jul-18                            | 7.18         | 1.428                | 0.793                        | 0.040     | 4.09               | 2.63       | 280.00                                 | <LOQ      | 34         | <LOQ        | <LOQ       | <LOQ        | <LOQ         | 99           | 34         | 5.7       | 43          | 29          |
| 6-Aug-18                             | 4.70         | 1.318                | 1.082                        | <LOQ      | 4.29               | 2.41       | 420.00                                 | <LOQ      | 38         | <LOQ        | <LOQ       | 1.04        | <LOQ         | 100          | 37         | 5.8       | 45          | 33          |
| 5-Sep-18                             | 3.18         |                      |                              | <LOQ      | 4.40               |            | 500.00                                 |           |            |             |            |             |              |              |            |           |             |             |
| 24-Sep-18                            |              |                      |                              | <LOQ      |                    |            | 720.00                                 |           |            |             |            |             |              |              |            |           |             |             |
| 30-Oct-18                            |              |                      |                              | 0.022     | 4.48               | 1.99       | 320.00                                 |           |            |             |            |             |              |              |            |           |             |             |
| 23-Jan-19                            |              |                      |                              | 0.050     | 4.62               | 0.62       | 480.00                                 | <LOQ      | 33         |             | <LOQ       |             |              | 92           | 36         | 6.3       | 46          | 39          |
| 4-Feb-19                             |              |                      |                              | 0.037     |                    | 2.54       | 160.00                                 | <LOQ      | 34         | <LOQ        | <LOQ       | <LOQ        | <LOQ         | 144          | 37         | 6.1       | 46          | 40          |
| 20-May-19                            | 4.64         | 0.643                | 0.219                        | 0.044     | 4.68               | 1.99       | 200.00                                 | <LOQ      | 32         | <LOQ        | <LOQ       | <LOQ        | <LOQ         | 89           | 36         | 6.1       | 46          | 40          |
| 19-Jun-19                            | 6.32         | 1.433                | 0.405                        | 0.031     | 4.83               | 3.75       | 240.00                                 | <LOQ      | 33         | <LOQ        | <LOQ       | <LOQ        | <LOQ         | 96           | 36         | 5.9       | 46          | 38          |
| 17-Jul-19                            | 7.69         | 2.496                | 1.033                        | 0.028     | 4.32               | 2.44       | 350.00                                 | <LOQ      | 35         | <LOQ        | <LOQ       | <LOQ        | <LOQ         | 99           | 37         | 6.1       | 46          | 33          |
| 10-Sep-19                            | 19.38        | 6.633                | 5.430                        | 0.034     | 4.18               | 2.16       | 200.00                                 | <LOQ      | 36         | <LOQ        | <LOQ       | <LOQ        | <LOQ         | 99           | 38         | 6.2       | 47          | 29          |
| 21-Oct-19                            |              |                      |                              | <LOQ      | 4.50               | 2.03       | 260.00                                 | <LOQ      | 34         |             | <LOQ       |             |              | 93           | 37         | 6.0       | 47          | 35          |
| 29-Jan-20                            |              |                      |                              |           |                    | 1.00       | 480.00                                 | <LOQ      | 34         | <LOQ        | <LOQ       | 0.71        | <LOQ         | 97           | 37         | 6.1       | 47          | 37          |
| 21-May-20                            | 4.24         |                      |                              | 0.025     |                    | 2.31       | 340.00                                 | <LOQ      | 40         | <LOQ        | <LOQ       | <LOQ        | <LOQ         | 94           | 35         | 5.9       | 44          | 36          |
| 9-Jun-20                             | 5.31         | 1.272                | 0.131                        | 0.038     |                    | 1.43       | 280.00                                 | <LOQ      | 34         | <LOQ        | <LOQ       | <LOQ        | <LOQ         | 142          | 37         | 6.0       | 47          | 38          |
| 7-Jul-20                             | 5.35         | 1.908                | 1.494                        | 0.016     |                    | 1.45       | 440.00                                 | <LOQ      | 58         | <LOQ        | <LOQ       | <LOQ        | <LOQ         | 100          | 37         | 6.1       | 47          | 37          |
| 24-Aug-20                            |              | 3.401                | 1.773                        | 0.018     |                    | 1.48       | 300.00                                 | <LOQ      | 35         | <LOQ        | <LOQ       | <LOQ        | <LOQ         | 97           | 37         | 6.0       | 47          | 31          |
| 22-Sep-20                            | 31.77        | 2.698                | 1.420                        | 0.029     |                    | 5.67       | 220.00                                 | <LOQ      | 36         | <LOQ        | <LOQ       | 0.38        | <LOQ         | 108          | 36         | 5.9       | 45          | 25          |
| 19-Oct-20                            |              |                      |                              | 0.021     |                    | 2.10       | 300.00                                 | <LOQ      | 37         | <LOQ        | <LOQ       | <LOQ        | <LOQ         | 103          | 39         | 6.0       | 48          | 29          |
| Bathing area sampling point (Site 1) |              |                      |                              |           |                    |            |                                        |           |            |             |            |             |              |              |            |           |             |             |
| Sampling Date                        | Chl-α (µg/L) | Total Biomass (mg/L) | Cyanobacteria Biomass (mg/L) | TP (mg/L) | Alkalinity (meq/L) | TSS (mg/L) | Transparency (Secchi disc depth in cm) | F- (mg/L) | Cl- (mg/L) | NO2- (mg/L) | Br- (mg/L) | NO3- (mg/L) | PO43- (mg/L) | SO42- (mg/L) | Na+ (mg/L) | K+ (mg/L) | Mg2+ (mg/L) | Ca2+ (mg/L) |
| 4-Jul-18                             | 6.53         |                      | 1.358                        | 0.033     | 4.04               | 1.71       | 240.00                                 | <LOQ      | 35         | <LOQ        | <LOQ       | 0.44        | <LOQ         | 98           | 38         | 8.4       | 46          | 32          |
| 12-Jul-18                            | 5.83         |                      | 0.850                        | 0.047     | 4.13               | 3.23       | 290.00                                 | <LOQ      | 35         | <LOQ        | <LOQ       | 0.81        | <LOQ         | 121          | 38         | 6.2       | 46          | 34          |
| 17-Jul-18                            | 6.66         |                      | 1.432                        | 0.033     | 4.31               | 2.56       | 290.00                                 | <LOQ      | 34         | <LOQ        | <LOQ       | <LOQ        | <LOQ         | 84           | 34         | 5.4       | 43          | 30          |
| 6-Aug-18                             | 3.29         |                      | 0.359                        | <LOQ      | 4.26               |            |                                        | <LOQ      | 38         | <LOQ        | <LOQ       | 0.25        | <LOQ         | 98           | 36         | 5.5       | 45          | 35          |
| 5-Sep-18                             | 3.03         |                      | 0.010                        | <LOQ      | 4.30               | 0.61       | 500.00                                 |           |            |             |            |             |              |              |            |           |             |             |
| 24-Sep-18                            | 4.73         |                      | 0.030                        | <LOQ      | 4.41               | 0.65       | 580.00                                 |           |            |             |            |             |              |              |            |           |             |             |
| 15-Oct-18                            | 5.32         |                      |                              | <LOQ      | 4.52               | 0.59       | 460.00                                 |           |            |             |            |             |              |              |            |           |             |             |

**Table S2.** Concentrations of Extracellular CTs from Lake Vegoritis (µg/L).

| ID | SAMPLE DETAILS      | CYN             | ATX | dmMC-RR | MC-RR | NOD | MC-YR | MC-HtyR | dmM C-LR | MC-LR | MC-HilR | MC-WR | MC-LA | MC-LY | MC-LW | MC-LF |
|----|---------------------|-----------------|-----|---------|-------|-----|-------|---------|----------|-------|---------|-------|-------|-------|-------|-------|
| 1  | 31/7/2018 – Site 1  | ND <sup>1</sup> | ND  | ND      | <LOQ  | ND  | ND    | ND      | ND       | ND    | ND      | ND    | ND    | ND    | ND    | ND    |
| 2  | 31/7/2018 – Site 2  | ND              | ND  | ND      | <LOQ  | ND  | ND    | ND      | ND       | ND    | ND      | ND    | ND    | ND    | ND    | ND    |
| 3  | 6/8/2018 – Site 1   | ND              | ND  | ND      | 0.023 | ND  | ND    | ND      | ND       | 0.021 | ND      | ND    | ND    | ND    | ND    | ND    |
| 4  | 6/8/2018 – Site 2   | ND              | ND  | ND      | 0.017 | ND  | <LOQ  | ND      | ND       | 0.013 | ND      | ND    | ND    | ND    | ND    | ND    |
| 5  | 21/8/2018 – Site 1  | ND              | ND  | ND      | 0.020 | ND  | 0.014 | ND      | ND       | 0.028 | ND      | ND    | ND    | ND    | ND    | ND    |
| 6  | 21/8/2018 – Site 2  | ND              | ND  | ND      | 0.023 | ND  | <LOQ  | ND      | ND       | 0.029 | ND      | ND    | ND    | ND    | ND    | ND    |
| 7  | 5/9/2018 – Site 1   | ND              | ND  | ND      | <LOQ  | ND  | ND    | ND      | ND       | <LOQ  | ND      | ND    | ND    | ND    | ND    | ND    |
| 8  | 5/9/2018 – Site 2   | ND              | ND  | ND      | <LOQ  | ND  | ND    | ND      | ND       | ND    | ND      | ND    | ND    | ND    | ND    | ND    |
| 9  | 24/9/2018 – Site 1  | ND              | ND  | ND      | <LOQ  | ND  | ND    | ND      | ND       | ND    | ND      | ND    | ND    | ND    | ND    | ND    |
| 10 | 24/9/2018 – Site 2  | ND              | ND  | ND      | <LOQ  | ND  | ND    | ND      | ND       | ND    | ND      | ND    | ND    | ND    | ND    | ND    |
| 11 | 15/10/2018 – Site 1 | ND              | ND  | ND      | ND    | ND  | ND    | ND      | ND       | ND    | ND      | ND    | ND    | ND    | ND    | ND    |
| 12 | 15/10/2018 – Site 2 | ND              | ND  | ND      | ND    | ND  | ND    | ND      | ND       | ND    | ND      | ND    | ND    | ND    | ND    | ND    |
| 13 | 7/11/2018 – Site 1  | ND              | ND  | ND      | 0.009 | ND  | ND    | ND      | ND       | 0.029 | ND      | ND    | ND    | ND    | ND    | ND    |
| 14 | 7/11/2018 – Site 2  | ND              | ND  | ND      | ND    | ND  | ND    | ND      | ND       | ND    | ND      | ND    | ND    | ND    | ND    | ND    |
| 15 | 10/4/2019 – Site 1  | ND              | ND  | ND      | ND    | ND  | ND    | ND      | ND       | ND    | ND      | ND    | ND    | ND    | ND    | ND    |
| 16 | 10/4/2019 – Site 2  | 0.004           | ND  | ND      | ND    | ND  | ND    | ND      | ND       | ND    | ND      | ND    | ND    | ND    | ND    | ND    |
| 17 | 2/5/2019 – Site 1   | <LOQ            | ND  | ND      | ND    | ND  | ND    | ND      | ND       | ND    | ND      | ND    | ND    | ND    | ND    | ND    |
| 18 | 2/5/2019 – Site 2   | <LOQ            | ND  | ND      | ND    | ND  | ND    | ND      | ND       | ND    | ND      | ND    | ND    | ND    | ND    | ND    |
| 19 | 20/5/2019 – Site 1  | <LOQ            | ND  | ND      | ND    | ND  | ND    | ND      | ND       | <LOQ  | ND      | ND    | ND    | ND    | ND    | ND    |
| 20 | 20/5/2019 – Site 2  | <LOQ            | ND  | ND      | ND    | ND  | ND    | ND      | ND       | ND    | ND      | ND    | ND    | ND    | ND    | ND    |
| 21 | 27/5/2019 – Site 1  | <LOQ            | ND  | ND      | ND    | ND  | ND    | ND      | ND       | 0.071 | ND      | ND    | ND    | ND    | ND    | ND    |
| 22 | 27/5/2019 – Site 2  | <LOQ            | ND  | ND      | ND    | ND  | ND    | ND      | ND       | 0.086 | ND      | ND    | ND    | ND    | ND    | ND    |
| 23 | 5/6/2019 – Site 1   | <LOQ            | ND  | ND      | ND    | ND  | ND    | ND      | 0.073    | 0.188 | ND      | ND    | ND    | ND    | ND    | ND    |
| 24 | 5/6/2019 – Site 2   | 0.004           | ND  | ND      | ND    | ND  | ND    | ND      | 0.080    | 0.233 | ND      | ND    | ND    | ND    | ND    | ND    |
| 25 | 18/6/2019 – Site 1  | <LOQ            | ND  | ND      | ND    | ND  | ND    | ND      | ND       | 0.089 | ND      | ND    | ND    | ND    | ND    | ND    |
| 26 | 18/6/2019 – Site 2  | <LOQ            | ND  | ND      | ND    | ND  | ND    | ND      | ND       | 0.092 | ND      | ND    | ND    | ND    | ND    | ND    |
| 27 | 15/7/2019 – Site 1  | <LOQ            | ND  | ND      | ND    | ND  | ND    | ND      | ND       | ND    | ND      | ND    | ND    | ND    | ND    | ND    |

|    |                     |       |    |    |       |    |       |       |       |       |       |    |    |    |    |    |
|----|---------------------|-------|----|----|-------|----|-------|-------|-------|-------|-------|----|----|----|----|----|
| 28 | 15/7/2019 – Site 2  | <LOQ  | ND | ND | ND    | ND | ND    | ND    | ND    | 0.013 | ND    | ND | ND | ND | ND | ND |
| 29 | 5/8/2019 – Site 1   | ND    | ND | ND | ND    | ND | ND    | ND    | ND    | 0.015 | ND    | ND | ND | ND | ND | ND |
| 30 | 5/8/2019 – Site 2   | ND    | ND | ND | ND    | ND | ND    | ND    | ND    | <LOQ  | ND    | ND | ND | ND | ND | ND |
| 31 | 2/9/2019 – Site 1   | 0.032 | ND | ND | ND    | ND | ND    | ND    | ND    | ND    | ND    | ND | ND | ND | ND | ND |
| 32 | 2/9/2019 – Site 2   | 0.026 | ND | ND | ND    | ND | ND    | ND    | ND    | ND    | ND    | ND | ND | ND | ND | ND |
| 33 | 1/10/2019 – Site 1  | 0.042 | ND | ND | ND    | ND | ND    | ND    | ND    | ND    | ND    | ND | ND | ND | ND | ND |
| 34 | 1/10/2019 – Site 2  | 0.089 | ND | ND | ND    | ND | ND    | ND    | ND    | ND    | ND    | ND | ND | ND | ND | ND |
| 35 | 10/10/2019 – Site 1 | 0.014 | ND | ND | ND    | ND | ND    | ND    | ND    | ND    | ND    | ND | ND | ND | ND | ND |
| 36 | 10/10/2019 – Site 2 | 0.019 | ND | ND | ND    | ND | ND    | ND    | ND    | ND    | ND    | ND | ND | ND | ND | ND |
| 37 | 22/10/2019 – Site 1 | 0.114 | ND | ND | ND    | ND | ND    | ND    | ND    | ND    | ND    | ND | ND | ND | ND | ND |
| 38 | 22/10/2019 – Site 2 | 0.027 | ND | ND | ND    | ND | ND    | ND    | ND    | ND    | ND    | ND | ND | ND | ND | ND |
| 39 | 19/5/2020 – Site 1  | 0.095 | ND | ND | ND    | ND | ND    | ND    | ND    | ND    | ND    | ND | ND | ND | ND | ND |
| 40 | 19/5/2020 – Site 2  | 0.104 | ND | ND | ND    | ND | ND    | ND    | ND    | ND    | ND    | ND | ND | ND | ND | ND |
| 41 | 25/5/2020 – Site 1  | 0.112 | ND | ND | ND    | ND | ND    | ND    | ND    | <LOQ  | ND    | ND | ND | ND | ND | ND |
| 42 | 25/5/2020 – Site 2  | 0.107 | ND | ND | ND    | ND | ND    | ND    | ND    | <LOQ  | ND    | ND | ND | ND | ND | ND |
| 43 | 9/6/2020 – Site 1   | 0.081 | ND | ND | ND    | ND | ND    | ND    | ND    | 0.023 | ND    | ND | ND | ND | ND | ND |
| 44 | 9/6/2020 – Site 2   | 0.081 | ND | ND | ND    | ND | ND    | ND    | ND    | 0.021 | ND    | ND | ND | ND | ND | ND |
| 45 | 22/6/2020 – Site 1  | 0.080 | ND | ND | ND    | ND | ND    | 0.069 | 0.036 | 0.285 | 0.033 | ND | ND | ND | ND | ND |
| 46 | 22/6/2020 – Site 2  | 0.077 | ND | ND | ND    | ND | 0.020 | 0.069 | 0.035 | 0.315 | 0.029 | ND | ND | ND | ND | ND |
| 47 | 13/7/2020 – Site 1  | 0.128 | ND | ND | ND    | ND | ND    | ND    | ND    | ND    | ND    | ND | ND | ND | ND | ND |
| 48 | 13/7/2020 – Site 2  | 0.126 | ND | ND | ND    | ND | ND    | ND    | ND    | ND    | ND    | ND | ND | ND | ND | ND |
| 49 | 10/8/2020 – Site 1  | 0.063 | ND | ND | ND    | ND | ND    | ND    | ND    | 0.014 | ND    | ND | ND | ND | ND | ND |
| 50 | 10/8/2020 – Site 2  | 0.060 | ND | ND | ND    | ND | ND    | ND    | ND    | ND    | ND    | ND | ND | ND | ND | ND |
| 51 | 7/9/2020 – Site 1   | 0.071 | ND | ND | 0.008 | ND | ND    | ND    | ND    | ND    | ND    | ND | ND | ND | ND | ND |
| 52 | 7/9/2020 – Site 2   | 0.076 | ND | ND | 0.006 | ND | ND    | ND    | ND    | ND    | ND    | ND | ND | ND | ND | ND |
| 53 | 17/9/2020 – Site 1  | 0.025 | ND | ND | 0.017 | ND | ND    | ND    | ND    | 0.018 | ND    | ND | ND | ND | ND | ND |
| 54 | 17/9/2020 – Site 2  | 0.022 | ND | ND | 0.020 | ND | ND    | ND    | ND    | 0.042 | ND    | ND | ND | ND | ND | ND |

|    |                     |       |    |    |       |    |       |    |    |       |    |    |    |    |    |    |
|----|---------------------|-------|----|----|-------|----|-------|----|----|-------|----|----|----|----|----|----|
| 55 | 5/10/2020 – Site 1  | 0.009 | ND | ND | 0.021 | ND | ND    | ND | ND | ND    | ND | ND | ND | ND | ND | ND |
| 56 | 5/10/2020 – Site 2  | 0.007 | ND | ND | 0.015 | ND | ND    | ND | ND | ND    | ND | ND | ND | ND | ND | ND |
| 57 | 29/10/2020 – Site 1 | 0.038 | ND | ND | 0.013 | ND | ND    | ND | ND | 0.012 | ND | ND | ND | ND | ND | ND |
| 58 | 29/10/2020 – Site 2 | 0.030 | ND | ND | 0.010 | ND | 0.155 | ND | ND | 0.155 | ND | ND | ND | ND | ND | ND |

<sup>1</sup>ND: Not Detected, <sup>2</sup><LOQ: Values higher than limit of detection (LOD) and lower than limit of quantitation (LOQ).

|            | CYN   | ATX   | dmMC-RR | MC-RR | NOD   | MC-YR | MC-HtyR | dmMC-LR | MC-LR | MC-HilR | MC-WR | MC-LA | MC-LY | MC-LW | MC-LF |
|------------|-------|-------|---------|-------|-------|-------|---------|---------|-------|---------|-------|-------|-------|-------|-------|
| LOD (µg/L) | 0.001 | 0.001 | 0.002   | 0.001 | 0.002 | 0.004 | 0.007   | 0.004   | 0.004 | 0.006   | 0.006 | 0.003 | 0.006 | 0.004 | 0.005 |
| LOQ (µg/L) | 0.003 | 0.003 | 0.006   | 0.003 | 0.006 | 0.013 | 0.020   | 0.011   | 0.013 | 0.019   | 0.017 | 0.009 | 0.018 | 0.013 | 0.016 |

**Table S3.** Concentrations of Intracellular CTs from Lake Vegoritis (µg/L).

|    | SAMPLE DETAILS      | CYN             | ATX | dmMC-RR | MC-RR | NOD | MC-YR | MC-HtyR | dmM C-LR          | MC-LR | MC-HilR | MC-WR | MC-LA | MC-LY | MC-LW | MC-LF |
|----|---------------------|-----------------|-----|---------|-------|-----|-------|---------|-------------------|-------|---------|-------|-------|-------|-------|-------|
| 1  | 31/7/2018 – Site 1  | ND <sup>1</sup> | ND  | 0.003   | 0.074 | ND  | 0.026 | ND      | <LOQ <sup>2</sup> | 0.043 | ND      | ND    | ND    | ND    | ND    | ND    |
| 2  | 31/7/2018 – Site 2  | ND              | ND  | <LOQ    | 0.047 | ND  | 0.015 | ND      | ND                | 0.020 | ND      | ND    | ND    | ND    | ND    | ND    |
| 3  | 6/8/2018 – Site 1   | ND              | ND  | ND      | 0.026 | ND  | 0.020 | ND      | <LOQ              | 0.017 | ND      | ND    | ND    | ND    | ND    | ND    |
| 4  | 6/8/2018 – Site 2   | ND              | ND  | <LOQ    | 0.033 | ND  | 0.023 | ND      | ND                | 0.025 | ND      | ND    | ND    | ND    | ND    | ND    |
| 5  | 21/8/2018 – Site 1  | ND              | ND  | ND      | 0.009 | ND  | <LOQ  | ND      | <LOQ              | 0.028 | ND      | ND    | ND    | ND    | ND    | ND    |
| 6  | 21/8/2018 – Site 2  | ND              | ND  | ND      | 0.005 | ND  | 0.007 | ND      | ND                | 0.006 | ND      | ND    | ND    | ND    | ND    | ND    |
| 7  | 5/9/2018 – Site 1   | ND              | ND  | ND      | <LOQ  | ND  | ND    | ND      | ND                | 0.005 | ND      | ND    | ND    | ND    | ND    | ND    |
| 8  | 5/9/2018 – Site 2   | ND              | ND  | ND      | <LOQ  | ND  | ND    | ND      | ND                | 0.003 | ND      | ND    | ND    | ND    | ND    | ND    |
| 9  | 24/9/2018 – Site 1  | ND              | ND  | ND      | <LOQ  | ND  | ND    | ND      | ND                | <LOQ  | ND      | ND    | ND    | ND    | ND    | ND    |
| 10 | 24/9/2018 – Site 2  | ND              | ND  | ND      | ND    | ND  | ND    | ND      | ND                | ND    | ND      | ND    | ND    | ND    | ND    | ND    |
| 11 | 15/10/2018 – Site 1 | ND              | ND  | ND      | ND    | ND  | ND    | ND      | ND                | ND    | ND      | ND    | ND    | ND    | ND    | ND    |



|    |                     |       |    |    |       |    |    |      |       |       |       |    |    |    |    |    |
|----|---------------------|-------|----|----|-------|----|----|------|-------|-------|-------|----|----|----|----|----|
| 12 | 15/10/2018 – Site 2 | ND    | ND | ND | ND    | ND | ND | ND   | ND    | ND    | ND    | ND | ND | ND | ND | ND |
| 13 | 7/11/2018 – Site 1  | ND    | ND | ND | 0.027 | ND | ND | ND   | ND    | 0.055 | ND    | ND | ND | ND | ND | ND |
| 14 | 7/11/2018 – Site 2  | ND    | ND | ND | 0.011 | ND | ND | ND   | ND    | 0.009 | ND    | ND | ND | ND | ND | ND |
| 15 | 10/4/2019 – Site 1  | ND    | ND | ND | ND    | ND | ND | ND   | ND    | ND    | ND    | ND | ND | ND | ND | ND |
| 16 | 10/4/2019 – Site 2  | ND    | ND | ND | ND    | ND | ND | ND   | ND    | ND    | ND    | ND | ND | ND | ND | ND |
| 17 | 2/5/2019 – Site 1   | ND    | ND | ND | ND    | ND | ND | ND   | ND    | ND    | ND    | ND | ND | ND | ND | ND |
| 18 | 2/5/2019 – Site 2   | ND    | ND | ND | ND    | ND | ND | ND   | ND    | ND    | ND    | ND | ND | ND | ND | ND |
| 19 | 20/5/2019 – Site 1  | ND    | ND | ND | ND    | ND | ND | ND   | ND    | 0.036 | ND    | ND | ND | ND | ND | ND |
| 20 | 20/5/2019 – Site 2  | ND    | ND | ND | ND    | ND | ND | ND   | <LOQ  | 0.048 | ND    | ND | ND | ND | ND | ND |
| 21 | 27/5/2019 – Site 1  | ND    | ND | ND | ND    | ND | ND | <LOQ | 0.055 | 0.241 | 0.027 | ND | ND | ND | ND | ND |
| 22 | 27/5/2019 – Site 2  | ND    | ND | ND | ND    | ND | ND | <LOQ | 0.046 | 0.148 | ND    | ND | ND | ND | ND | ND |
| 23 | 5/6/2019 – Site 1   | ND    | ND | ND | ND    | ND | ND | ND   | ND    | ND    | ND    | ND | ND | ND | ND | ND |
| 24 | 5/6/2019 – Site 2   | ND    | ND | ND | ND    | ND | ND | ND   | ND    | ND    | ND    | ND | ND | ND | ND | ND |
| 25 | 18/6/2019 – Site 1  | ND    | ND | ND | ND    | ND | ND | ND   | ND    | ND    | ND    | ND | ND | ND | ND | ND |
| 26 | 18/6/2019 – Site 2  | ND    | ND | ND | ND    | ND | ND | ND   | ND    | ND    | ND    | ND | ND | ND | ND | ND |
| 27 | 15/7/2019 – Site 1  | ND    | ND | ND | ND    | ND | ND | ND   | ND    | <LOQ  | ND    | ND | ND | ND | ND | ND |
| 28 | 15/7/2019 – Site 2  | ND    | ND | ND | ND    | ND | ND | ND   | ND    | ND    | ND    | ND | ND | ND | ND | ND |
| 29 | 5/8/2019 – Site 1   | ND    | ND | ND | ND    | ND | ND | ND   | ND    | <LOQ  | ND    | ND | ND | ND | ND | ND |
| 30 | 5/8/2019 – Site 2   | ND    | ND | ND | ND    | ND | ND | ND   | ND    | <LOQ  | ND    | ND | ND | ND | ND | ND |
| 31 | 2/9/2019 – Site 1   | 0.032 | ND | ND | <LOQ  | ND | ND | ND   | ND    | <LOQ  | ND    | ND | ND | ND | ND | ND |

|    |                     |       |    |    |       |    |    |      |       |       |      |    |    |    |    |    |
|----|---------------------|-------|----|----|-------|----|----|------|-------|-------|------|----|----|----|----|----|
| 32 | 2/9/2019 – Site 2   | 0.047 | ND | ND | ND    | ND | ND | ND   | ND    | ND    | ND   | ND | ND | ND | ND | ND |
| 33 | 1/10/2019 – Site 1  | 0.685 | ND | ND | 0.029 | ND | ND | ND   | ND    | 0.105 | ND   | ND | ND | ND | ND | ND |
| 34 | 1/10/2019 – Site 2  | 0.332 | ND | ND | <LOQ  | ND | ND | ND   | ND    | <LOQ  | ND   | ND | ND | ND | ND | ND |
| 35 | 10/10/2019 – Site 1 | 0.567 | ND | ND | 0.009 | ND | ND | ND   | ND    | 0.018 | ND   | ND | ND | ND | ND | ND |
| 36 | 10/10/2019 – Site 2 | 0.523 | ND | ND | 0.007 | ND | ND | ND   | ND    | 0.018 | ND   | ND | ND | ND | ND | ND |
| 37 | 22/10/2019 – Site 1 | 0.342 | ND | ND | <LOQ  | ND | ND | ND   | ND    | <LOQ  | ND   | ND | ND | ND | ND | ND |
| 38 | 22/10/2019 – Site 2 | 0.486 | ND | ND | <LOQ  | ND | ND | ND   | ND    | <LOQ  | ND   | ND | ND | ND | ND | ND |
| 39 | 19/5/2020 – Site 1  | ND    | ND | ND | ND    | ND | ND | ND   | ND    | ND    | ND   | ND | ND | ND | ND | ND |
| 40 | 19/5/2020 – Site 2  | ND    | ND | ND | ND    | ND | ND | ND   | ND    | <LOQ  | ND   | ND | ND | ND | ND | ND |
| 41 | 25/5/2020 – Site 1  | ND    | ND | ND | ND    | ND | ND | ND   | ND    | 0.020 | ND   | ND | ND | ND | ND | ND |
| 42 | 25/5/2020 – Site 2  | ND    | ND | ND | ND    | ND | ND | ND   | ND    | 0.039 | ND   | ND | ND | ND | ND | ND |
| 43 | 9/6/2020 – Site 1   | ND    | ND | ND | ND    | ND | ND | ND   | ND    | ND    | ND   | ND | ND | ND | ND | ND |
| 44 | 9/6/2020 – Site 2   | ND    | ND | ND | ND    | ND | ND | ND   | ND    | ND    | ND   | ND | ND | ND | ND | ND |
| 45 | 22/6/2020 – Site 1  | ND    | ND | ND | ND    | ND | ND | <LOQ | <LOQ  | 0.141 | <LOQ | ND | ND | ND | ND | ND |
| 46 | 22/6/2020 – Site 2  | ND    | ND | ND | ND    | ND | ND | <LOQ | 0.020 | 0.146 | <LOQ | ND | ND | ND | ND | ND |
| 47 | 13/7/2020 – Site 1  | ND    | ND | ND | ND    | ND | ND | ND   | ND    | ND    | ND   | ND | ND | ND | ND | ND |
| 48 | 13/7/2020 – Site 2  | ND    | ND | ND | ND    | ND | ND | ND   | ND    | ND    | ND   | ND | ND | ND | ND | ND |
| 49 | 10/8/2020 – Site 1  | ND    | ND | ND | <LOQ  | ND | ND | ND   | ND    | ND    | ND   | ND | ND | ND | ND | ND |

|    |                     |       |    |       |       |    |       |    |    |       |    |    |    |    |    |    |
|----|---------------------|-------|----|-------|-------|----|-------|----|----|-------|----|----|----|----|----|----|
| 50 | 10/8/2020 – Site 2  | ND    | ND | ND    | 0.005 | ND | ND    | ND | ND | ND    | ND | ND | ND | ND | ND | ND |
| 51 | 7/9/2020 – Site 1   | ND    | ND | 0.010 | 0.674 | ND | 0.199 | ND | ND | 0.137 | ND | ND | ND | ND | ND | ND |
| 52 | 7/9/2020 – Site 2   | 0.005 | ND | ND    | 0.084 | ND | ND    | ND | ND | 0.013 | ND | ND | ND | ND | ND | ND |
| 53 | 17/9/2020 – Site 1  | 0.075 | ND | <LOQ  | 0.151 | ND | <LOQ  | ND | ND | 0.062 | ND | ND | ND | ND | ND | ND |
| 54 | 17/9/2020 – Site 2  | 0.066 | ND | <LOQ  | 0.080 | ND | <LOQ  | ND | ND | 0.059 | ND | ND | ND | ND | ND | ND |
| 55 | 5/10/2020 – Site 1  | 0.070 | ND | ND    | 0.240 | ND | 0.041 | ND | ND | 0.088 | ND | ND | ND | ND | ND | ND |
| 56 | 5/10/2020 – Site 2  | 0.066 | ND | ND    | 0.224 | ND | 0.078 | ND | ND | 0.090 | ND | ND | ND | ND | ND | ND |
| 57 | 29/10/2020 – Site 1 | 0.016 | ND | ND    | 0.159 | ND | 0.086 | ND | ND | 0.093 | ND | ND | ND | ND | ND | ND |
| 58 | 29/10/2020 – Site 2 | 0.030 | ND | <LOQ  | 0.064 | ND | 0.044 | ND | ND | 0.040 | ND | ND | ND | ND | ND | ND |

<sup>1</sup> ND: Not Detected, <sup>2</sup> <LOQ: Values higher than limit of detection (LOD) and lower than limit of quantitation (LOQ). \* Limits of detection (LODs) for intracellular toxins altered based on the sample volume that passed through the filter. Indicatively, LODs were 0.001 µg/L for CYN and ATX, 0.003 µg/L for NOD while ranged from 0.001 to 0.009 µg/L for MCs when 1000 ml of water sample passed through the filter. LOQs were 0.004 µg/L for CYN and ANA-a, 0.008 µg/L for NOD and varied from 0.003 to 0.029 µg/L for MCs when 1000 ml of water sample passed through the filter.

**Table S4.** Concentrations of Extracellular CPs from Lake Vegoritis (µg/L).

| ID | SAMPLE DETAILS      | MG FR1 <sup>A</sup> | MG FR3 <sup>A</sup> | MG T1 <sup>A</sup> | MG T2 <sup>A</sup> | AER <sup>A</sup> 602/K139 | AER <sup>A</sup> 298A | AEG A <sup>A</sup> | AP B  | AP F <sup>B</sup> | OSC Y <sup>B</sup> |
|----|---------------------|---------------------|---------------------|--------------------|--------------------|---------------------------|-----------------------|--------------------|-------|-------------------|--------------------|
| 1  | 31/7/2018 – Site 1  | ND <sup>1</sup>     | ND                  | ND                 | ND                 | ND                        | ND                    | 0.015              | 0.003 | <LOQ              | ND                 |
| 2  | 31/7/2018 – Site 2  | ND                  | ND                  | ND                 | ND                 | ND                        | ND                    | ND                 | 0.002 | <LOQ              | ND                 |
| 3  | 6/8/2018 – Site 1   | ND                  | ND                  | ND                 | ND                 | ND                        | ND                    | <LOQ <sup>2</sup>  | ND    | ND                | ND                 |
| 4  | 6/8/2018 – Site 2   | ND                  | ND                  | ND                 | ND                 | ND                        | ND                    | ND                 | ND    | <LOQ              | ND                 |
| 5  | 21/8/2018 – Site 1  | ND                  | ND                  | ND                 | ND                 | ND                        | ND                    | 0.022              | 0.008 | 0.003             | ND                 |
| 6  | 21/8/2018 – Site 2  | ND                  | ND                  | ND                 | ND                 | ND                        | ND                    | ND                 | 0.005 | <LOQ              | ND                 |
| 7  | 5/9/2018 – Site 1   | ND                  | ND                  | ND                 | ND                 | ND                        | ND                    | ND                 | <LOQ  | <LOQ              | ND                 |
| 8  | 5/9/2018 – Site 2   | ND                  | ND                  | ND                 | ND                 | ND                        | ND                    | ND                 | <LOQ  | <LOQ              | ND                 |
| 9  | 24/9/2018 – Site 1  | ND                  | ND                  | ND                 | ND                 | ND                        | ND                    | ND                 | ND    | ND                | ND                 |
| 10 | 24/9/2018 – Site 2  | ND                  | ND                  | ND                 | ND                 | ND                        | ND                    | ND                 | ND    | ND                | ND                 |
| 11 | 15/10/2018 – Site 1 | ND                  | ND                  | ND                 | ND                 | ND                        | ND                    | ND                 | ND    | ND                | ND                 |
| 12 | 15/10/2018 – Site 2 | ND                  | ND                  | ND                 | ND                 | ND                        | ND                    | ND                 | ND    | ND                | ND                 |
| 13 | 7/11/2018 – Site 1  | na <sup>3</sup>     | na                  | na                 | na                 | na                        | na                    | na                 | na    | na                | na                 |
| 14 | 7/11/2018 – Site 2  | na                  | na                  | na                 | na                 | na                        | na                    | na                 | na    | na                | na                 |
| 15 | 10/4/2019 – Site 1  | ND                  | ND                  | ND                 | ND                 | ND                        | ND                    | ND                 | 0.003 | 0.003             | ND                 |
| 16 | 10/4/2019 – Site 2  | ND                  | ND                  | ND                 | ND                 | ND                        | ND                    | ND                 | 0.008 | 0.008             | ND                 |
| 17 | 2/5/2019 – Site 1   | ND                  | ND                  | ND                 | ND                 | ND                        | ND                    | ND                 | ND    | ND                | ND                 |
| 18 | 2/5/2019 – Site 2   | ND                  | ND                  | ND                 | ND                 | ND                        | ND                    | ND                 | ND    | ND                | ND                 |
| 19 | 20/5/2019 – Site 1  | ND                  | ND                  | ND                 | ND                 | ND                        | ND                    | ND                 | ND    | ND                | ND                 |
| 20 | 20/5/2019 – Site 2  | ND                  | ND                  | ND                 | ND                 | ND                        | ND                    | ND                 | <LOQ  | 0.005             | ND                 |
| 21 | 27/5/2019 – Site 1  | ND                  | ND                  | ND                 | ND                 | ND                        | ND                    | ND                 | 0.007 | 0.012             | <LOQ               |
| 22 | 27/5/2019 – Site 2  | ND                  | ND                  | ND                 | ND                 | ND                        | ND                    | ND                 | 0.011 | 0.024             | ND                 |
| 23 | 5/6/2019 – Site 1   | ND                  | ND                  | ND                 | ND                 | ND                        | ND                    | ND                 | ND    | ND                | ND                 |
| 24 | 5/6/2019 – Site 2   | ND                  | ND                  | ND                 | ND                 | ND                        | ND                    | ND                 | <LOQ  | <LOQ              | ND                 |
| 25 | 18/6/2019 – Site 1  | ND                  | ND                  | ND                 | ND                 | ND                        | ND                    | ND                 | ND    | ND                | ND                 |
| 26 | 18/6/2019 – Site 2  | ND                  | ND                  | ND                 | ND                 | ND                        | ND                    | ND                 | ND    | ND                | ND                 |
| 27 | 15/7/2019 – Site 1  | ND                  | ND                  | ND                 | ND                 | ND                        | ND                    | ND                 | 0.004 | ND                | ND                 |
| 28 | 15/7/2019 – Site 2  | ND                  | ND                  | ND                 | ND                 | ND                        | ND                    | ND                 | 0.003 | ND                | ND                 |

|    |                     |    |    |    |    |       |    |    |       |       |      |
|----|---------------------|----|----|----|----|-------|----|----|-------|-------|------|
| 29 | 5/8/2019 – Site 1   | ND | ND | ND | ND | ND    | ND | ND | ND    | ND    | ND   |
| 30 | 5/8/2019 – Site 2   | ND | ND | ND | ND | ND    | ND | ND | <LOQ  | <LOQ  | ND   |
| 31 | 2/9/2019 – Site 1   | ND | ND | ND | ND | ND    | ND | ND | <LOQ  | <LOQ  | ND   |
| 32 | 2/9/2019 – Site 2   | ND | ND | ND | ND | ND    | ND | ND | <LOQ  | <LOQ  | ND   |
| 33 | 1/10/2019 – Site 1  | ND | ND | ND | ND | ND    | ND | ND | <LOQ  | 0.003 | ND   |
| 34 | 1/10/2019 – Site 2  | ND | ND | ND | ND | ND    | ND | ND | 0.020 | 0.023 | ND   |
| 35 | 10/10/2019 – Site 1 | ND | ND | ND | ND | ND    | ND | ND | <LOQ  | ND    | ND   |
| 36 | 10/10/2019 – Site 2 | ND | ND | ND | ND | ND    | ND | ND | <LOQ  | <LOQ  | ND   |
| 37 | 22/10/2019 – Site 1 | ND | ND | ND | ND | ND    | ND | ND | 0.004 | 0.005 | ND   |
| 38 | 22/10/2019 – Site 2 | ND | ND | ND | ND | ND    | ND | ND | <LOQ  | <LOQ  | ND   |
| 39 | 19/5/2020 – Site 1  | ND | ND | ND | ND | ND    | ND | ND | ND    | ND    | ND   |
| 40 | 19/5/2020 – Site 2  | ND | ND | ND | ND | ND    | ND | ND | ND    | ND    | ND   |
| 41 | 25/5/2020 – Site 1  | ND | ND | ND | ND | ND    | ND | ND | <LOQ  | ND    | ND   |
| 42 | 25/5/2020 – Site 2  | ND | ND | ND | ND | ND    | ND | ND | <LOQ  | ND    | ND   |
| 43 | 9/6/2020 – Site 1   | ND | ND | ND | ND | ND    | ND | ND | ND    | ND    | ND   |
| 44 | 9/6/2020 – Site 2   | ND | ND | ND | ND | ND    | ND | ND | ND    | ND    | ND   |
| 45 | 22/6/2020 – Site 1  | ND | ND | ND | ND | ND    | ND | ND | 0.011 | 0.009 | <LOQ |
| 46 | 22/6/2020 – Site 2  | ND | ND | ND | ND | ND    | ND | ND | 0.007 | 0.008 | ND   |
| 47 | 13/7/2020 – Site 1  | ND | ND | ND | ND | ND    | ND | ND | 0.004 | ND    | ND   |
| 48 | 13/7/2020 – Site 2  | ND | ND | ND | ND | ND    | ND | ND | 0.012 | <LOQ  | ND   |
| 49 | 10/8/2020 – Site 1  | ND | ND | ND | ND | ND    | ND | ND | ND    | ND    | ND   |
| 50 | 10/8/2020 – Site 2  | ND | ND | ND | ND | ND    | ND | ND | ND    | ND    | ND   |
| 51 | 7/9/2020 – Site 1   | ND | ND | ND | ND | ND    | ND | ND | 0.003 | 0.005 | ND   |
| 52 | 7/9/2020 – Site 2   | ND | ND | ND | ND | ND    | ND | ND | <LOQ  | <LOQ  | ND   |
| 53 | 17/9/2020 – Site 1  | ND | ND | ND | ND | 0.154 | ND | ND | <LOQ  | 0.005 | ND   |
| 54 | 17/9/2020 – Site 2  | ND | ND | ND | ND | ND    | ND | ND | <LOQ  | 0.005 | ND   |
| 55 | 5/10/2020 – Site 1  | ND | ND | ND | ND | ND    | ND | ND | 0.004 | 0.005 | ND   |
| 56 | 5/10/2020 – Site 2  | ND | ND | ND | ND | ND    | ND | ND | 0.006 | 0.007 | ND   |

|    |                     |    |    |    |    |       |    |    |      |      |    |
|----|---------------------|----|----|----|----|-------|----|----|------|------|----|
| 57 | 29/10/2020 – Site 1 | ND | ND | ND | ND | ND    | ND | ND | <LOQ | <LOQ | ND |
| 58 | 29/10/2020 – Site 2 | ND | ND | ND | ND | 0.042 | ND | ND | ND   | ND   | ND |

<sup>1</sup> ND: Not Detected, <sup>2</sup> <LOQ: Values higher than limit of detection (LOD) and lower than limit of quantitation (LOQ). na: Not available data. <sup>A</sup> Microginin FR1, FR3, T1 & T2, Aeruginosin 602/K139 & 298A and Aeruginosamide concentrations are expressed as Microcystin-LR equivalents. <sup>B</sup> Anabaenopeptin F and Oscillamide Y concentrations are expressed as Anabaenopeptin B equivalents. LOD for extracellular Anabaenopeptin B was 0.001 µg/L and LOQ was 0.003 µg/L.

**Table S5.** Concentrations of Intracellular CPs from Lake Vegoritis (µg/L).

| ID | SAMPLE DETAILS      | MG FR1 <sup>A</sup> | MG FR3 <sup>A</sup> | MG T1 <sup>A</sup> | MG T2 <sup>A</sup> | AER <sup>A</sup> 602/K139 | AER <sup>A</sup> 298A | AEG A <sup>A</sup> | AP B  | AP F <sup>B</sup> | OSC Y <sup>B</sup> |
|----|---------------------|---------------------|---------------------|--------------------|--------------------|---------------------------|-----------------------|--------------------|-------|-------------------|--------------------|
| 1  | 31/7/2018 – Site 1  | 0.064               | 0.153               | 1.16               | 0.315              | 0.048                     | ND <sup>1</sup>       | 0.068              | 0.302 | 0.117             | 0.003              |
| 2  | 31/7/2018 – Site 2  | 0.051               | 0.137               | 0.870              | 0.206              | 0.034                     | ND                    | 0.033              | 0.160 | 0.066             | <LOQ               |
| 3  | 6/8/2018 – Site 1   | <LOQ <sup>2</sup>   | 0.028               | 0.474              | 0.105              | 0.017                     | ND                    | <LOQ               | 0.112 | 0.057             | <LOQ               |
| 4  | 6/8/2018 – Site 2   | 0.026               | 0.021               | 0.218              | 0.044              | 0.030                     | ND                    | 0.015              | 0.060 | 0.055             | <LOQ               |
| 5  | 21/8/2018 – Site 1  | 0.031               | 0.049               | 0.336              | 0.072              | 0.047                     | ND                    | 0.040              | 0.076 | 0.040             | <LOQ               |
| 6  | 21/8/2018 – Site 2  | ND                  | 0.037               | 0.050              | <LOQ               | <LOQ                      | ND                    | <LOQ               | 0.021 | 0.022             | ND                 |
| 7  | 5/9/2018 – Site 1   | ND                  | ND                  | ND                 | ND                 | ND                        | ND                    | ND                 | 0.006 | 0.006             | ND                 |
| 8  | 5/9/2018 – Site 2   | ND                  | ND                  | ND                 | ND                 | ND                        | ND                    | ND                 | 0.005 | 0.008             | ND                 |
| 9  | 24/9/2018 – Site 1  | ND                  | ND                  | ND                 | ND                 | ND                        | ND                    | ND                 | 0.019 | 0.015             | ND                 |
| 10 | 24/9/2018 – Site 2  | ND                  | ND                  | ND                 | ND                 | ND                        | ND                    | ND                 | 0.012 | 0.010             | ND                 |
| 11 | 15/10/2018 – Site 1 | ND                  | ND                  | ND                 | ND                 | ND                        | ND                    | ND                 | 0.003 | <LOQ              | <LOQ               |
| 12 | 15/10/2018 – Site 2 | ND                  | ND                  | ND                 | ND                 | ND                        | ND                    | ND                 | <LOQ  | ND                | 0.006              |
| 13 | 7/11/2018 – Site 1  | na <sup>3</sup>     | na                  | na                 | na                 | na                        | na                    | na                 | na    | na                | na                 |
| 14 | 7/11/2018 – Site 2  | na                  | na                  | na                 | na                 | na                        | na                    | na                 | na    | na                | na                 |
| 15 | 10/4/2019 – Site 1  | ND                  | ND                  | ND                 | ND                 | ND                        | ND                    | ND                 | 0.067 | 0.095             | 0.008              |
| 16 | 10/4/2019 – Site 2  | ND                  | ND                  | ND                 | ND                 | ND                        | ND                    | ND                 | 0.468 | 0.617             | 0.042              |
| 17 | 2/5/2019 – Site 1   | ND                  | ND                  | ND                 | ND                 | ND                        | ND                    | ND                 | 0.028 | 0.070             | 0.005              |
| 18 | 2/5/2019 – Site 2   | ND                  | ND                  | ND                 | ND                 | ND                        | ND                    | ND                 | 0.041 | 0.088             | 0.006              |
| 19 | 20/5/2019 – Site 1  | ND                  | ND                  | ND                 | ND                 | ND                        | ND                    | ND                 | 0.127 | 0.334             | 0.024              |
| 20 | 20/5/2019 – Site 2  | ND                  | ND                  | ND                 | ND                 | ND                        | ND                    | ND                 | 0.241 | 0.548             | 0.033              |
| 21 | 27/5/2019 – Site 1  | ND                  | ND                  | ND                 | ND                 | <LOQ                      | ND                    | ND                 | 0.574 | 1.219             | 0.078              |
| 22 | 27/5/2019 – Site 2  | ND                  | ND                  | ND                 | ND                 | <LOQ                      | ND                    | ND                 | 0.774 | 1.911             | 0.110              |
| 23 | 5/6/2019 – Site 1   | ND                  | ND                  | ND                 | ND                 | 0.049                     | 0.039                 | ND                 | 0.016 | 0.035             | <LOQ               |
| 24 | 5/6/2019 – Site 2   | ND                  | ND                  | ND                 | ND                 | 0.128                     | <LOQ                  | ND                 | 0.021 | 0.047             | 0.005              |
| 25 | 18/6/2019 – Site 1  | ND                  | ND                  | ND                 | ND                 | ND                        | ND                    | ND                 | <LOQ  | 0.008             | ND                 |
| 26 | 18/6/2019 – Site 2  | ND                  | ND                  | ND                 | ND                 | ND                        | ND                    | ND                 | <LOQ  | <LOQ              | ND                 |
| 27 | 15/7/2019 – Site 1  | ND                  | ND                  | ND                 | ND                 | ND                        | ND                    | ND                 | 0.110 | 0.028             | <LOQ               |
| 28 | 15/7/2019 – Site 2  | ND                  | ND                  | ND                 | ND                 | <LOQ                      | ND                    | ND                 | 0.098 | 0.019             | <LOQ               |

|    |                     |       |       |       |       |       |       |       |       |       |       |
|----|---------------------|-------|-------|-------|-------|-------|-------|-------|-------|-------|-------|
| 29 | 5/8/2019 – Site 1   | ND    | 0.036 | 0.043 | <LOQ  |
| 30 | 5/8/2019 – Site 2   | ND    | ND    | ND    | ND    | 0.067 | ND    | ND    | 0.051 | 0.055 | <LOQ  |
| 31 | 2/9/2019 – Site 1   | ND    | ND    | ND    | ND    | <LOQ  | ND    | ND    | 0.089 | 0.139 | <LOQ  |
| 32 | 2/9/2019 – Site 2   | ND    | ND    | ND    | ND    | <LOQ  | ND    | ND    | 0.147 | 0.199 | ND    |
| 33 | 1/10/2019 – Site 1  | ND    | ND    | ND    | ND    | 0.110 | ND    | ND    | 0.238 | 0.256 | <LOQ  |
| 34 | 1/10/2019 – Site 2  | ND    | 0.065 | 0.076 | ND    |
| 35 | 10/10/2019 – Site 1 | ND    | 0.209 | 0.276 | <LOQ  |
| 36 | 10/10/2019 – Site 2 | ND    | 0.200 | 0.238 | ND    |
| 37 | 22/10/2019 – Site 1 | ND    | 0.241 | 0.321 | ND    |
| 38 | 22/10/2019 – Site 2 | ND    | ND    | ND    | ND    | <LOQ  | ND    | ND    | 0.307 | 0.454 | ND    |
| 39 | 19/5/2020 – Site 1  | ND    | 0.007 | 0.010 | ND    |
| 40 | 19/5/2020 – Site 2  | ND    | 0.007 | 0.017 | ND    |
| 41 | 25/5/2020 – Site 1  | ND    | 0.031 | 0.067 | 0.004 |
| 42 | 25/5/2020 – Site 2  | ND    | 0.041 | 0.091 | 0.007 |
| 43 | 9/6/2020 – Site 1   | ND    | 0.009 | 0.012 | ND    |
| 44 | 9/6/2020 – Site 2   | ND    | 0.006 | 0.008 | ND    |
| 45 | 22/6/2020 – Site 1  | ND    | 0.668 | 0.497 | 0.033 |
| 46 | 22/6/2020 – Site 2  | ND    | 0.790 | 0.583 | 0.039 |
| 47 | 13/7/2020 – Site 1  | <LOQ  | ND    | ND    | ND    | ND    | ND    | ND    | 0.342 | 0.027 | <LOQ  |
| 48 | 13/7/2020 – Site 2  | <LOQ  | ND    | ND    | ND    | 0.019 | ND    | ND    | 0.813 | 0.054 | <LOQ  |
| 49 | 10/8/2020 – Site 1  | <LOQ  | <LOQ  | 0.026 | <LOQ  | ND    | ND    | ND    | 0.005 | 0.007 | ND    |
| 50 | 10/8/2020 – Site 2  | <LOQ  | ND    | 0.078 | <LOQ  | ND    | ND    | ND    | 0.006 | 0.013 | ND    |
| 51 | 7/9/2020 – Site 1   | 0.593 | 1.68  | 47.0  | 10.7  | 0.282 | <LOQ  | 0.249 | 0.497 | 1.382 | 0.048 |
| 52 | 7/9/2020 – Site 2   | 0.118 | 0.197 | 5.43  | 1.122 | 0.089 | ND    | 0.023 | 0.085 | 0.150 | 0.005 |
| 53 | 17/9/2020 – Site 1  | <LOQ  | 0.107 | 2.78  | 0.298 | 0.054 | ND    | 0.036 | 0.074 | 0.187 | 0.005 |
| 54 | 17/9/2020 – Site 2  | <LOQ  | 0.051 | 1.72  | 0.167 | 0.047 | ND    | 0.020 | 0.048 | 0.135 | <LOQ  |
| 55 | 5/10/2020 – Site 1  | ND    | <LOQ  | 0.295 | 0.026 | 0.236 | <LOQ  | ND    | 0.137 | 0.180 | <LOQ  |
| 56 | 5/10/2020 – Site 2  | ND    | 0.046 | 0.756 | 0.045 | 0.514 | 0.025 | <LOQ  | 0.215 | 0.214 | 0.005 |
| 57 | 29/10/2020 – Site 1 | 1.33  | 0.917 | 0.895 | 0.177 | 0.119 | ND    | <LOQ  | 0.117 | 0.117 | 0.006 |



|    |                     |      |       |       |       |       |    |       |       |       |      |
|----|---------------------|------|-------|-------|-------|-------|----|-------|-------|-------|------|
| 58 | 29/10/2020 – Site 2 | 1.07 | 0.687 | 0.288 | 0.044 | 0.022 | ND | 0.019 | 0.072 | 0.069 | <LOQ |
|----|---------------------|------|-------|-------|-------|-------|----|-------|-------|-------|------|

<sup>1</sup> ND: Not Detected, <sup>2</sup> <LOQ: Values higher than limit of detection (LOD) and lower than limit of quantitation (LOQ). na: Not available data. <sup>A</sup> Microginin FR1, FR3, T1 & T2, Aeruginosin 602/K139 & 219A and Aeruginosamide concentrations are expressed as Microcystin-LR equivalents. <sup>B</sup> Anabaenopeptin F and Oscillamide Y concentrations are expressed as Anabaenopeptin B equivalents. LOD for intracellular Anabaenopeptin B altered based on the sample volume that passed through the filter and was 0.001 µg/L and LOQ was 0.004 µg/L, when 1000 ml of water sample passed through the filter. Concentrations for Anabaenopeptin F and Oscillamide Y were reported based on the calibration curve of Anabaenopeptin B, while Microginin FR1, FR3, T1 & T2, Aeruginosin 602/K139 & 298A and Aeruginosamide were reported based on the calibration curve of MC-LR.
